# Supplementary material
Source: PubMed Central journal article supplement (PMC3960403)

## Supporting Information

**Figure S1.** The  $k^3$ -weighted polarized Mn EXAFS spectra. Inset shows the crystal setting with respect to the incident X-ray  $\mathbf{e}$ -vector and the two rotation axes,  $\phi_{\text{crystal}}$  and  $\chi_{\text{crystal}}$ . The solid line (red), X-ray  $\mathbf{e}$ -vector parallel to the crystal  $b$ -axis ( $\phi_{\text{crystal}} = 90^\circ$ ,  $\chi_{\text{crystal}} = 0^\circ$ ); dotted line (green), X-ray  $\mathbf{e}$ -vector parallel to the  $c$ -axis ( $\phi_{\text{crystal}} = 0^\circ$ ,  $\chi_{\text{crystal}} = 0^\circ$ ); dash-dot line (blue), X-ray  $\mathbf{e}$ -vector parallel to the  $a$ -axis ( $\phi_{\text{crystal}} = 0^\circ$ ,  $\chi_{\text{crystal}} = 90^\circ$ ).

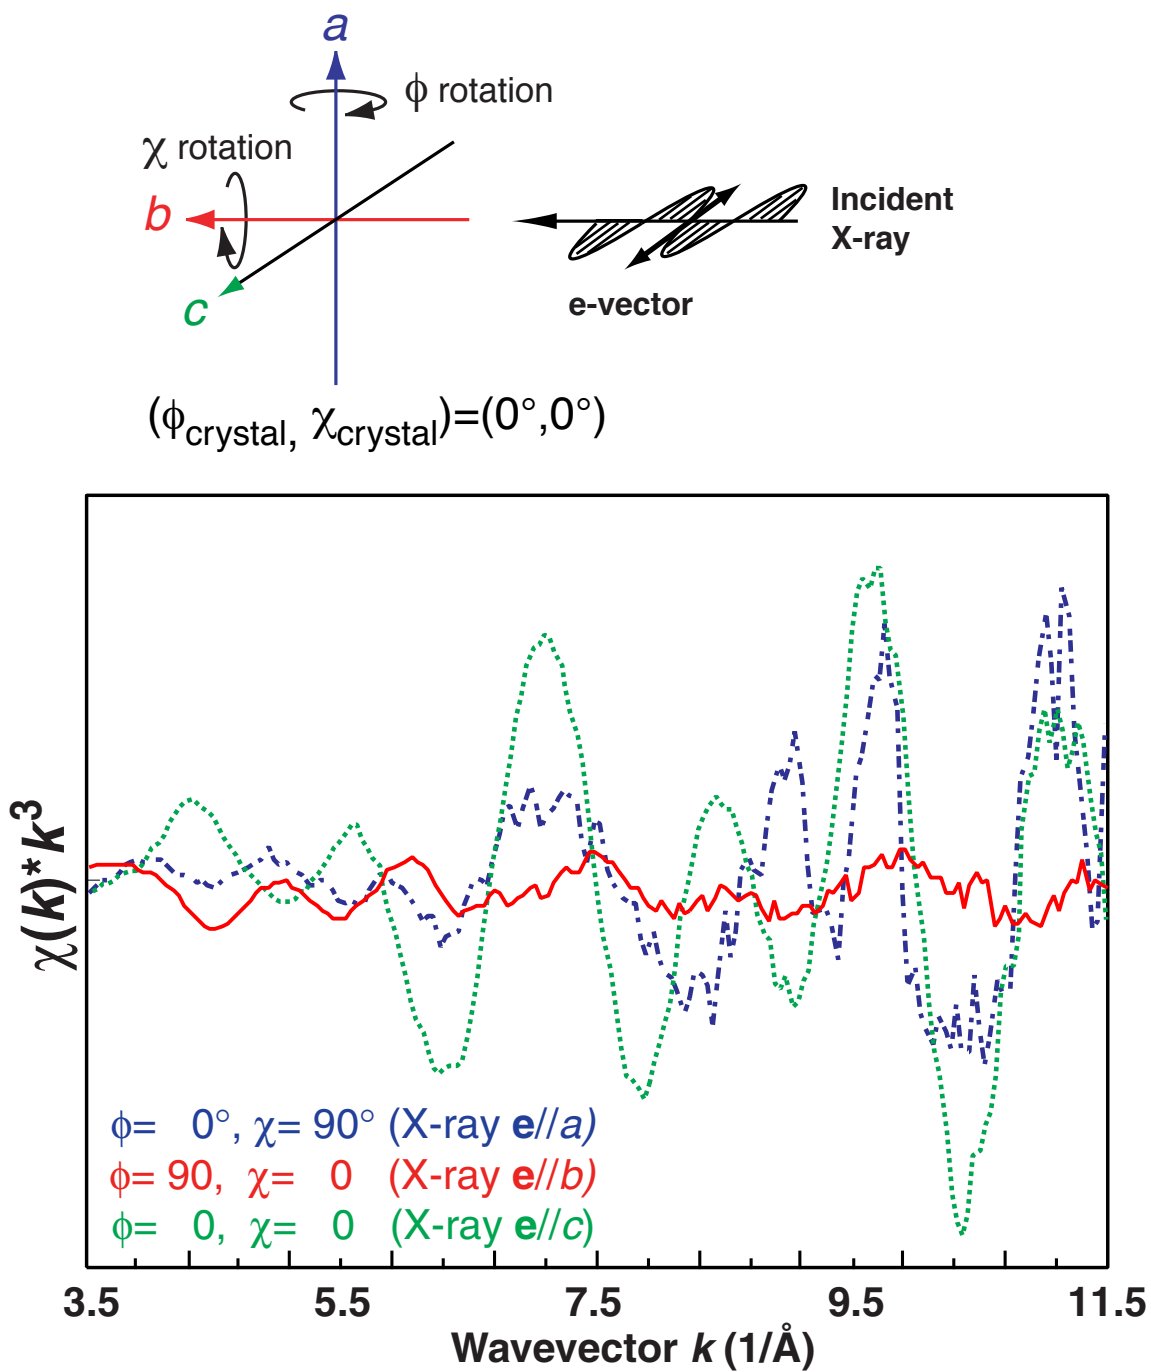

**Figure 2S.** Fourier transforms of the  $k^3$ -weighted polarized Mn EXAFS spectra. The solid line (red), X-ray  $\mathbf{e}$ -vector parallel to the crystal  $b$ -axis ( $\phi_{\text{crystal}} = 90^\circ$ ,  $\chi_{\text{crystal}} = 0^\circ$ ); dotted line (green), X-ray  $\mathbf{e}$ -vector parallel to the  $c$ -axis ( $\phi_{\text{crystal}} = 0^\circ$ ,  $\chi_{\text{crystal}} = 0^\circ$ ); dash-dot line (blue), X-ray  $\mathbf{e}$ -vector parallel to the  $a$ -axis ( $\phi_{\text{crystal}} = 0^\circ$ ,  $\chi_{\text{crystal}} = 90^\circ$ ). At  $(\phi_{\text{crystal}}, \chi_{\text{crystal}}) = (0^\circ, 0^\circ)$ , the Mn-Mn vector (at  $\sim 2.7 \text{ \AA}$ , the second Fourier peak) amplitude was maximal, while it was close to the noise level at  $(\phi_{\text{crystal}}, \chi_{\text{crystal}}) = (90^\circ, 0^\circ)$  orientation. The Mn-ligand vector amplitude at  $\sim 2 \text{ \AA}$  was also minimal at the  $(\phi_{\text{crystal}}, \chi_{\text{crystal}}) = (90^\circ, 0^\circ)$  orientation.

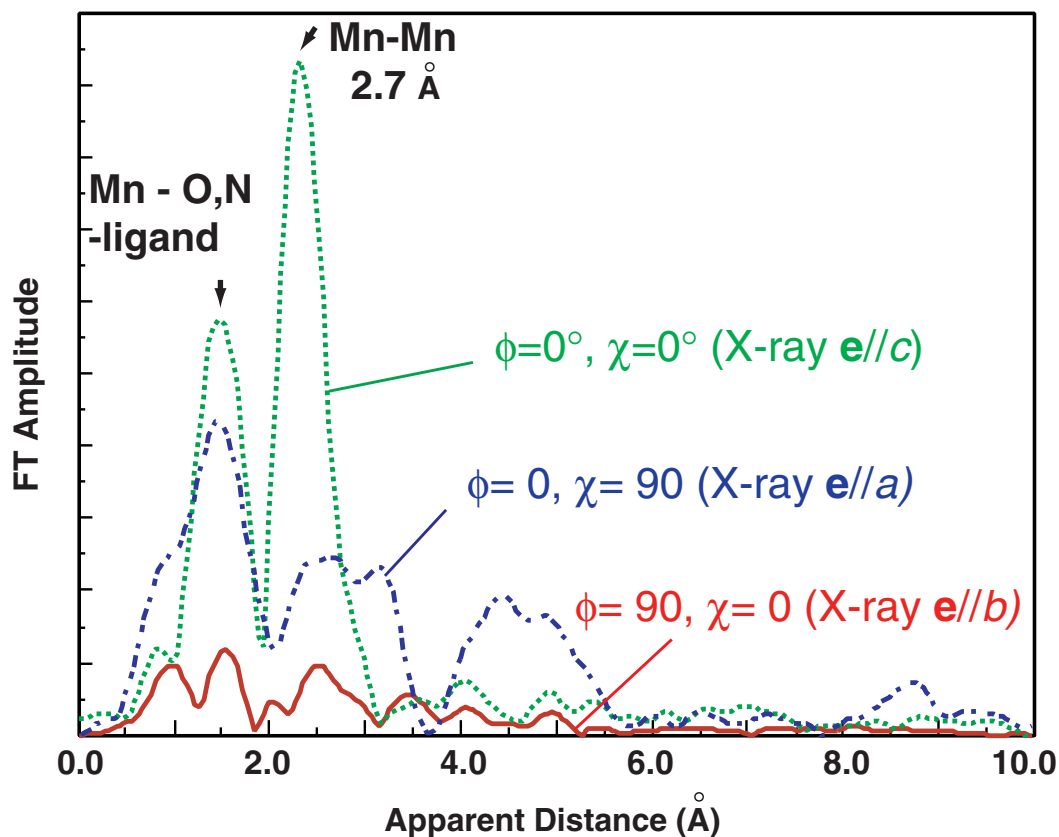

Supplement: NIHMS499686-supplement-PDF.pdf [file NIHMS499686-supplement-PDF.pdf]
